# Supplementary material for: Relative abundance of Mycobacterium bovis molecular types in cattle: a simulation study of potential epidemiological drivers
Source: PubMed Central journal article supplement (PMC5567634; doi:10.1186/s12917-017-1190-5), 2017-08-22
Supplement: 12917_2017_1190_MOESM5_ESM.pdf [file 12917_2017_1190_MOESM5_ESM.pdf]

within-badger  
transmission

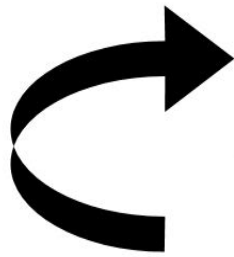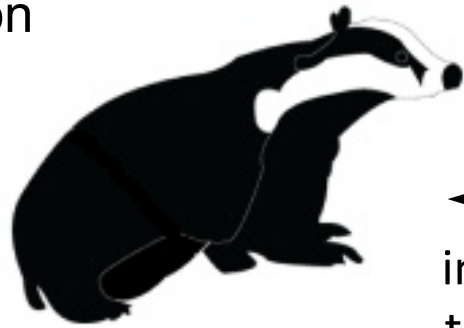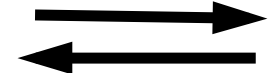

inter-species  
transmission

Immigration of MVLA-types  
(mainly Rol and GB)

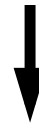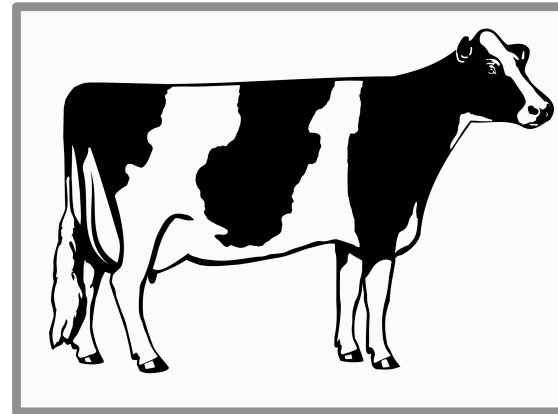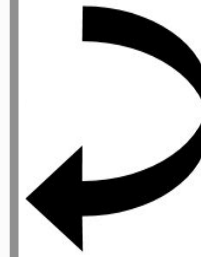

within-cattle  
transmission
